# Supplementary material
Source: MDPI journal article supplement (https://www.mdpi.com/2073-4352/13/7/989)
Supplement: s1 [file s1]

Supplementary material

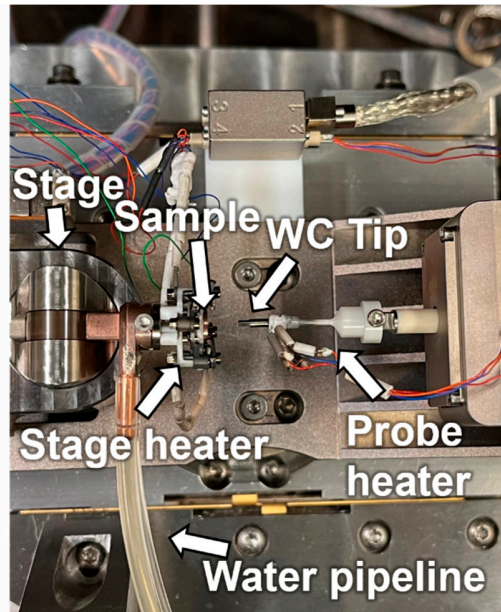

**Figure S1.** *In situ* high temperature compression set up using the Hysitron PI88 ×R PicoIndenter.
